# Supplementary material
Source: ML conference proceedings conference paper supplement (https://www.ecva.net/papers/eccv_2020/papers_ECCV/html/123640086_ECCV_2020_paper.php)
Supplement: Supplementary file 3 [file 123640086-supp.zip]

Archive with 5 entries (4 files):
- 3151-supp/
- 3151-supp/3151-supp.pdf
- __MACOSX/3151-supp/._3151-supp.pdf
- 3151-supp/3151-supp-video.mp4
- __MACOSX/3151-supp/._3151-supp-video.mp4
